# Supplementary material for: Spectroscopic and complementary thermodynamic study of liquid, supercooled, and glassy state of ethylene glycol
Source: Royal Society of Chemistry journal article supplement (doi:10.1039/d5cp02718g), 2025-01-01
Supplement: d5cp02718g1.pdf [file d5cp02718g1.pdf]

**Supporting information for manuscript #: MOLLIQ-D-25-01407**

Matthew Leonard and Bratoljub H. Milosavljevic\*

“Spectroscopic and complementary thermodynamic study  
of liquid, supercooled, and glassy state of ethylene glycol”

The IR spectra of liquid EG were previously reported and no absorption band was found at 1653  $\text{cm}^{-1}$  [References 31 and 33 in the main text]. However, the more recent publication [Reference 28 in the main text] reports such an absorption band, which was ascribed to a  $\text{CH}_2$  scissoring that is active in the IR but not active in the Raman.

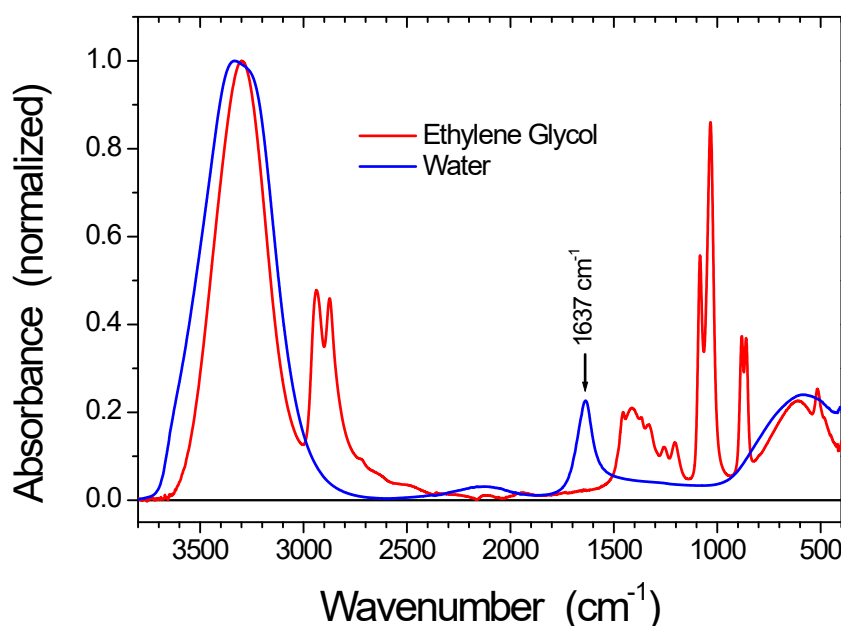

Figure S1. Comparison of the IR spectra of water and EG at room temperature.

We repeated the measurement using an anhydrous EG sample and compared the spectrum obtained to that of water (Figure S1.) No band was found at 1653  $\text{cm}^{-1}$  in the EG spectrum, but a band at 1637  $\text{cm}^{-1}$  is observed in the IR spectrum of water, possibly indicating an artefact in Reference 28 due to contamination of EG with water.

Our manuscript predominantly deals with the C-C-O bending mode in the EG Raman spectra of the liquid, supercooled and glassy states. Because of the discrepancies in the literature, it is pertinent to repeat the Raman spectroscopy measurements of the liquid and crystalline state of EG to ensure the accuracy of the wavenumbers and assignments of the modes studied in this and other works.

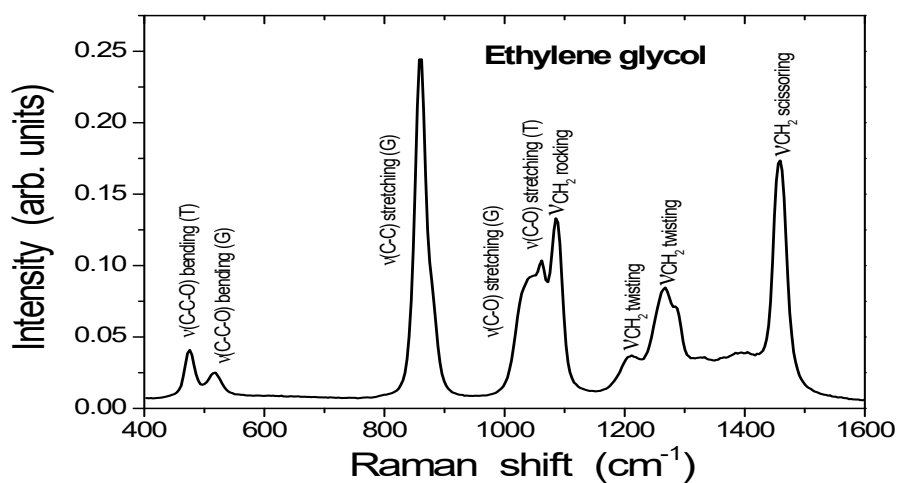

Figure S2A. Room temperature Raman spectrum of EG in the spectral range 400 – 1600  $\text{cm}^{-1}$  with the peaks assigned according to the References in Tables S1 & S2.

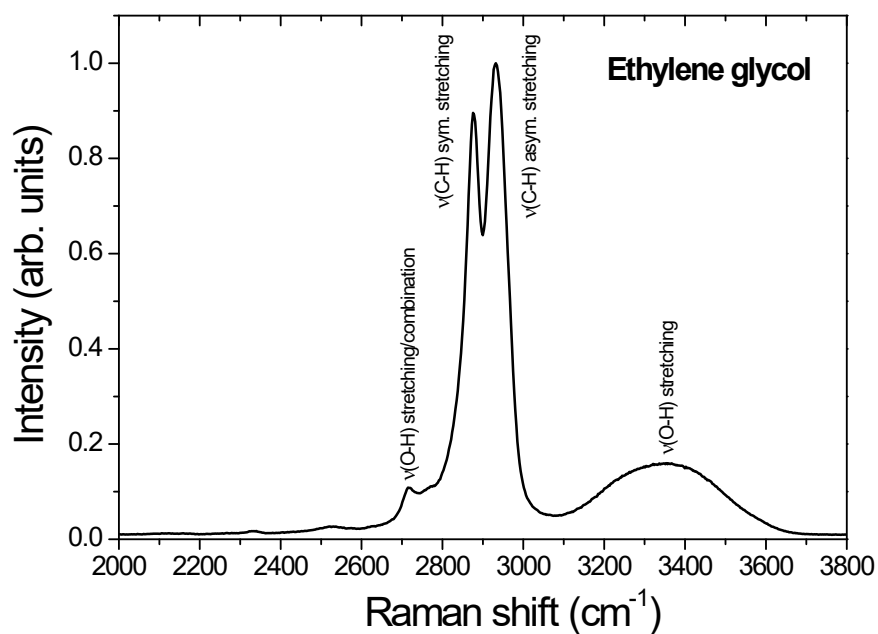

Figure S2B. Room temperature Raman spectrum of EG in the spectral range 2000 – 3800  $\text{cm}^{-1}$  with the peaks assigned according to the References in Table S1 & S2.

Table S1. The experimental IR and Raman bands (expressed in  $\text{cm}^{-1}$  units) of liquid ethylene glycol at room temperature, determined in this work. The assignments and references reporting them previously as well as the corresponding comments are also presented.

| IR           | Assignment                 | References                  | Raman        | Assignment                 | References              |
|--------------|----------------------------|-----------------------------|--------------|----------------------------|-------------------------|
| Not observed | Not active                 |                             | 347          | C-C-O bending              | 1, 3, 4, 5, 6           |
| Not observed | Not active                 |                             | 481          | C-C-O bending (trans)      | 1, 2, 3, 5, 6, 7        |
| 515          | C-C-O bending (gauche)     | 1, 2, 4, 5, 6               | 523          | C-C-O bending (gauche)     | 1, 2, 3, 4, 5, 6, 7     |
| 611 (broad)  | O-H torsion                | 4, 5, 6, 11                 | Not observed | Not active                 |                         |
| 860          | C-C stretching             | 1, 2, 3, 4, 5, 6, 11        | 860          | C-C stretching             | 1, 2, 3, 4, 5, 6        |
|              | CH <sub>2</sub> rocking    | 8                           |              |                            |                         |
| 881          | C-C stretching             | 11                          | Not observed | Not active                 |                         |
|              | CH <sub>2</sub> rocking    | 1, 4, 5, 6, 8               |              |                            |                         |
| 1033         | C-O stretching (gauche)    | 1, 2, 3, 4, 5, 6, 11        | 1047         | C-O stretching (gauche)    | 1, 2, 3, 4, 5, 6        |
| Not observed | Not active                 |                             | 1066         | C-O stretching (trans)     | 1, 2, 3, 4, 5           |
|              |                            |                             |              | CH <sub>2</sub> rocking    | 6                       |
| 1083         | C-O stretching             | 1, 3, 6, 11                 | 1090         | C-O stretching             | 1, 6                    |
|              | CH <sub>2</sub> rocking    | 2, 4, 5                     |              | CH <sub>2</sub> rocking    | 2, 3, 4, 5              |
| 1204         | CH <sub>2</sub> twisting   | 1, 2, 3, 4, 5, 6, 11        | 1212         | CH <sub>2</sub> twisting   | 1, 2, 3, 4, 5, 6        |
| 1257         | CH <sub>2</sub> wagging    | 1, 3, 11                    | 1268         | CH <sub>2</sub> wagging    | 1                       |
|              | CH <sub>2</sub> twisting   | 2, 4, 5, 6, 11              |              | CH <sub>2</sub> twisting   | 2, 3, 4, 5, 6           |
| 1332         | CH <sub>2</sub> wagging    | 1, 4, 5, 6, 11              | 1284         | CH <sub>2</sub> wagging    | 1, 4, 5, 6              |
| 1367         | CH <sub>2</sub> wagging    | 1, 4, 5, 6, 11              | Not observed | Not active                 |                         |
| 1412         | C-O-H bending              | 1, 3, 4, 5, 6, 11           | Not observed | Not active                 |                         |
| 1456         | CH <sub>2</sub> scissoring | 1, 2, 3, 4, 5, 6, 11        | 1459         | CH <sub>2</sub> scissoring | 1, 2, 3, 4, 5, 6        |
| Not observed | Not active                 |                             | 2722         | O-H stretching             | 1                       |
|              |                            |                             |              | combination                | 3, 5                    |
| 2873         | C-H symmetric stretching   | 1, 2, 3, 4, 5, 6, 9, 10, 11 | 2880         | C-H symmetric stretching   | 1, 2, 3, 4, 5, 6, 9, 10 |
| 2937         | C-H asymmetric stretching  | 1, 2, 3, 4, 5, 6, 9, 10, 11 | 2936         | C-H asymmetric stretching  | 1, 2, 3, 4, 5, 6, 9, 10 |
| 3298         | O-H stretching             | 1, 2, 3, 4, 5, 6, 9, 11     | 3346         | O-H stretching             | 1, 2, 3, 4, 5, 6, 9     |

Comments on the spectral assignments: It was found that the spectral assignments for the room temperature Raman and IR spectra agreed with the literature within  $\pm 10 \text{ cm}^{-1}$ .

Table S2: The experimental Raman bands of crystalline and glassy ethylene glycol, determined in this work. The assignments of the crystalline bands are presented along with the list of references.

| Raman, crystal<br>(−150 °C) (cm <sup>−1</sup> ) | Assignment               | References | Comments                       | Raman, glass<br>(−150 °C) (cm <sup>−1</sup> ) | Assignment               | References          |
|-------------------------------------------------|--------------------------|------------|--------------------------------|-----------------------------------------------|--------------------------|---------------------|
| 41                                              | “wing”                   | 1          |                                | 45 (broad)                                    | Boson                    |                     |
| 75                                              | “wing”                   | 1          |                                | Not observed                                  | Not active               |                     |
| 97                                              | “wing”                   | 1          |                                | Not observed                                  | Not active               |                     |
| 101                                             | “wing”                   | 1          |                                | Not observed                                  | Not active               |                     |
| 117                                             | “wing”                   | 1          |                                | 115 (shoulder)                                | Boson                    |                     |
| 132                                             | “wing”                   | 1          |                                | Not observed                                  | Not active               |                     |
| 148                                             | “wing”                   | 1          |                                | Not observed                                  | Not active               |                     |
|                                                 | “external mode”          | 3          |                                |                                               |                          |                     |
| 206                                             | “wing”                   | 1          |                                | Not observed                                  | Not active               |                     |
|                                                 | “external mode”          | 3          |                                |                                               |                          |                     |
| 268                                             | “wing”                   | 1          |                                | Not observed                                  | Not active               |                     |
|                                                 | “external mode”          | 3          |                                |                                               |                          |                     |
| 319                                             | “wing”                   | 1          |                                | Not observed                                  | Not active               |                     |
| 325                                             | C-C-O torsion            | 3          |                                | Not observed                                  | Not active               |                     |
| 355                                             | C-C-O bending            | 1, 3       | Appears at 382 in reference 3  | 351                                           | C-C-O bending            | 1, 3, 4, 5, 6       |
| Not observed                                    | Not active               |            |                                | 484                                           | C-C-O bending (trans)    | 1, 2, 3, 5, 6, 7    |
| 521                                             | C-C-O bending (gauche)   | 1, 3       | 579 and 592 in reference 3     | 525                                           | C-C-O bending (gauche)   | 1, 2, 3, 4, 5, 6, 7 |
| 526                                             |                          |            |                                |                                               |                          |                     |
| 657                                             | O-H torsion              | 3          | One peak at 709 in reference 3 | Not observed                                  | Not active               |                     |
| 755                                             | O-H torsion              | 3          |                                | Not observed                                  | Not active               |                     |
| Not observed                                    | Not active               |            |                                | 867                                           | C-C stretching           | 1, 2, 3, 4, 5, 6    |
| 1034                                            | No assignment            |            |                                | Not observed                                  | Not active               |                     |
| 1040                                            | C-O stretching (gauche)  | 1, 3       |                                | 1047                                          | C-O stretching (gauche)  | 1, 2, 3, 4, 5, 6    |
| 1050                                            |                          |            |                                |                                               |                          |                     |
| 1057                                            |                          |            |                                |                                               |                          |                     |
| Not observed                                    | Not active               |            |                                | 1068                                          | C-O stretching (trans)   | 1, 2, 3, 4, 5       |
|                                                 |                          |            |                                |                                               | CH <sub>2</sub> rocking  | 6                   |
| 1079                                            | No assignment            |            |                                | Not observed                                  | Not active               |                     |
| 1084                                            | No assignment            |            |                                | Not observed                                  | Not active               |                     |
| 1090                                            | C-O stretching           | 1, 3       | 1058 in reference 3            | 1091                                          | C-O stretching           | 1, 6                |
|                                                 |                          |            |                                |                                               | CH <sub>2</sub> rocking  | 2, 3, 4, 5          |
| 1207                                            | CH <sub>2</sub> twisting | 1, 3       | 1217 in reference 1            | 1218                                          | CH <sub>2</sub> twisting | 1, 2, 3, 4, 5, 6    |
| 1234                                            | CH <sub>2</sub> twisting | 1, 3       | 1241 in reference 3            | Not observed                                  | Not active               |                     |
| 1269                                            | CH <sub>2</sub> wagging  | 1          | 1273 in reference 3            | 1271                                          | CH <sub>2</sub> wagging  | 1                   |

|              |                            |      |                                     |                      |                            |                         |
|--------------|----------------------------|------|-------------------------------------|----------------------|----------------------------|-------------------------|
|              | CH <sub>2</sub> twisting   | 3    |                                     |                      | CH <sub>2</sub> twisting   | 2, 3, 4, 5, 6           |
| Not observed | Not active                 |      |                                     | 1293                 | CH <sub>2</sub> wagging    | 1, 4, 5, 6              |
| 1370         | CH <sub>2</sub> wagging    | 1    |                                     | Not observed         | Not active                 |                         |
| 1409         | C-O-H bending              | 1, 3 | 1382 in reference 1                 | Not observed         | Not active                 |                         |
| 1435         | No assignment              |      |                                     | Not observed         | Not active                 |                         |
| 1448         | No assignment              |      |                                     | Not observed         | Not active                 |                         |
| 1460         | CH <sub>2</sub> scissoring | 1, 3 | 1526 in reference 3                 | 1451                 | CH <sub>2</sub> scissoring | 1, 2, 3, 4, 5, 6        |
| 2721         | O-H stretching             | 1    |                                     | 2715 as well as 2747 | O-H stretching             | 1                       |
|              | combination                | 3    |                                     |                      | combination                | 3, 5                    |
| 2876         | C-H symmetric stretching   | 1, 3 | 2990 in reference 3                 | 2872                 | C-H symmetric stretching   | 1, 2, 3, 4, 5, 6, 9, 10 |
| 2932         | C-H asymmetric stretching  | 1, 3 | 3035 and 3057 in reference 3        | 2926                 | C-H asymmetric stretching  | 1, 2, 3, 4, 5, 6, 9, 10 |
| 2954         |                            |      |                                     |                      |                            |                         |
| 3087         | O-H stretching             | 1, 3 | 3156, 3227, and 3275 in reference 3 | 3190                 | O-H stretching             | 1, 2, 3, 4, 5, 6, 9     |
| 3169         |                            |      |                                     |                      |                            |                         |
| 3275         |                            |      |                                     |                      |                            |                         |

Comments: The O-H torsional mode in the spectrum of the crystal is reported as a single peak at 709 cm<sup>-1</sup> in Reference 3, yet two peaks are observed in this work. The 2 peaks assigned to the C-C-O bending mode of the gauche conformer in the crystalline phase are shifted to wavenumbers which are 50-60 cm<sup>-1</sup> higher in Reference 3. On the other hand, a shift of the C-O stretching mode at 1090 cm<sup>-1</sup> to lower wavenumbers (1058 cm<sup>-1</sup>) was observed in Reference 3. The assignments for the Raman spectrum of the crystalline state were found to deviate from the data published previously by as much as 60 cm<sup>-1</sup>; the C-H and O-H stretching modes deviated by almost 100 cm<sup>-1</sup>. In addition, five new Raman bands were reported for the crystalline phase; these can likely be attributed to the C-O stretching and the CH<sub>2</sub> scissoring modes.

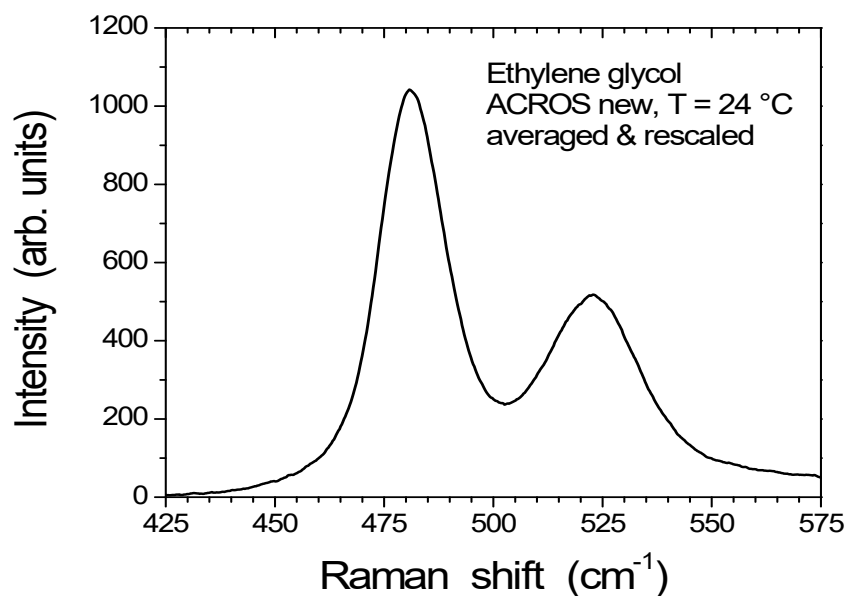

Figure S3. EG Raman spectrum of C-O stretching mode (0.7 cm<sup>-1</sup> resolution) at +24 °C. The larger band corresponds to the trans conformer while the smaller peak corresponds the gauche conformer.

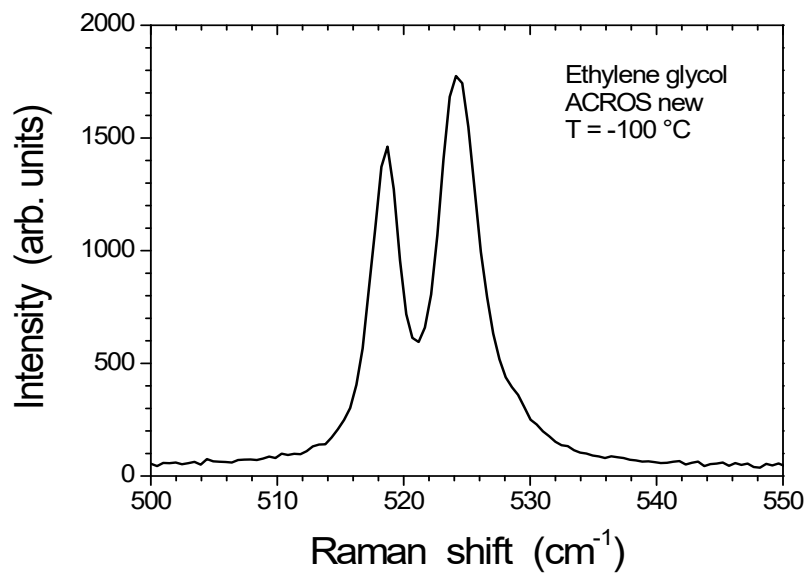

Figure S4. EG Raman spectrum of the gauche band in the C-O stretching mode (0.7 cm<sup>-1</sup> resolution) at -100 °C. The band splits into two peaks in the crystalline EG spectrum, while the peak corresponding to the trans conformer is not observed.

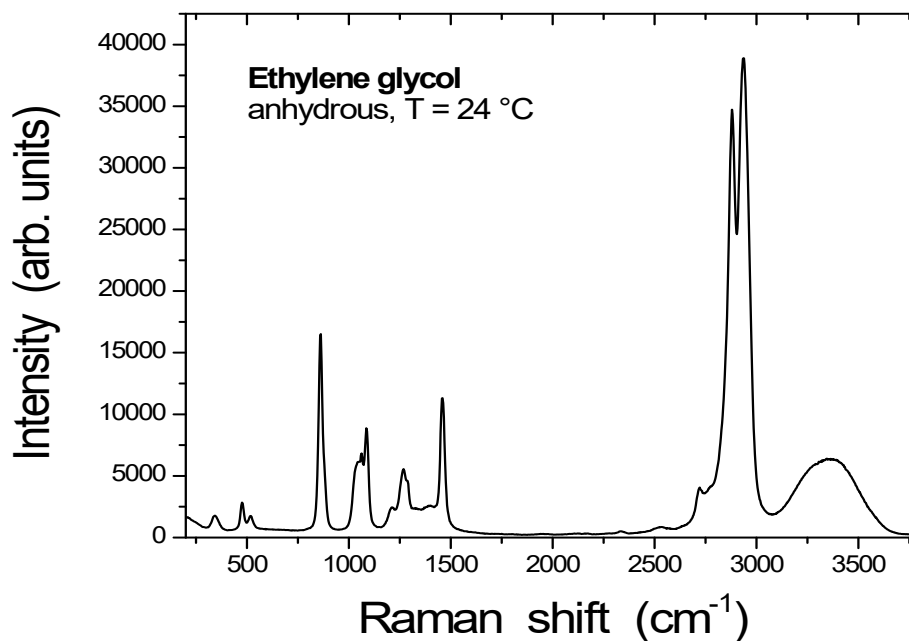

Figure S5. The room temperature Raman spectrum of EG ( $\sim 9 \text{ cm}^{-1}$  resolution).

The Clausius–Mossotti relation [12] was employed to calculate the high frequency single-molecule mean polarizability ( $\alpha$ ) of EG in the temperature range from  $-70$  to  $+15 \text{ }^{\circ}\text{C}$ :

$$\frac{\epsilon_{\infty} - 1}{\epsilon_{\infty} + 2} = \frac{4\pi}{3} \times N \times \alpha \quad (\text{S1})$$

Where  $\epsilon_{\infty}$  is the dielectric constant at the high frequency limit and  $N$  is the number density of the EG molecules. The dielectric constants needed were taken from reference 34 (in the main text) and our extrapolated measured densities were utilized [Reference 16 in the main text].

An increase in polarizability of about one order of magnitude occurs in this interval.

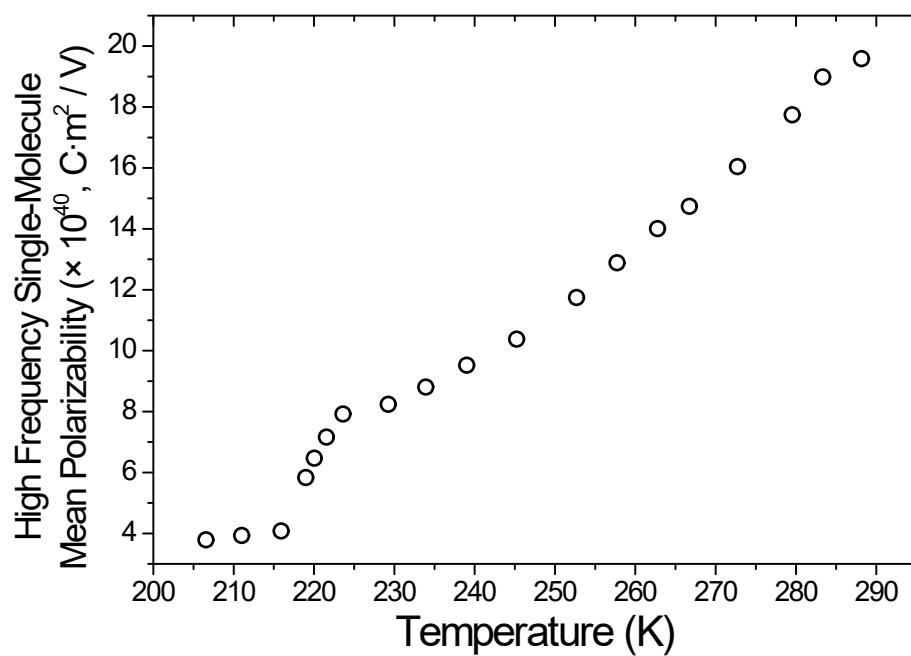

Figure S6. The high frequency single-molecule mean polarizability of EG in the temperature range from  $-70$  to  $+15$   $^{\circ}\text{C}$ .

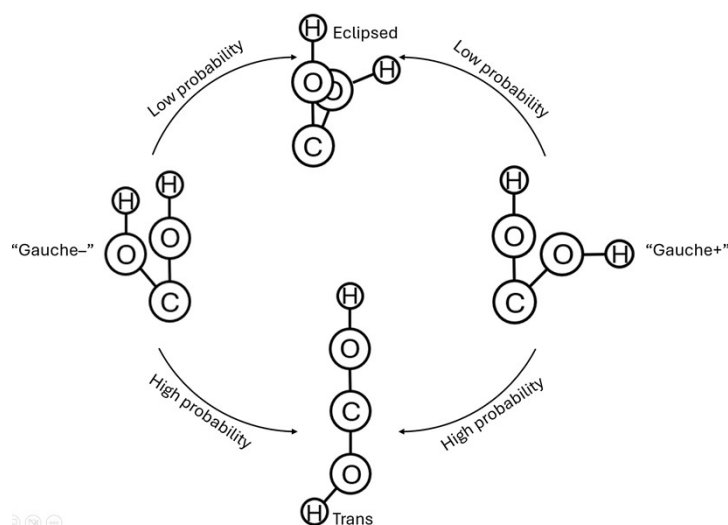

Figure S7. Reaction paths of  $G \rightarrow T$  enantiomer transformation according to the data from Reference 43 in the main text. The difference in reaction probabilities is due to the difference in activation energies ( $\Delta E = 15.3$  kJ/mol)



## References

1. K. Krishnan, R. S. Krishnan, Raman and Infrared Spectra of Ethylene Glycol, *Proc. Indian Acad. Sci. - Sect. A.* (1966), **64**, 111–122 <https://doi.org/10.1007/BF03047675>
2. A. Jindal, S. Vasudevan, Ethylene Glycol Dihedral Angle Dynamics: Relating Molecular Conformation to the Raman Spectrum of the Liquid, *J. Phys. Chem. B.* (2021), **125**(7), 1888–1895 <https://doi.org/10.1021/acs.jpcc.0c10921>
3. C. Murli, N. Lu, Z. Dong, Y. Song, Hydrogen Bonds and Conformations in Ethylene Glycol under Pressure, *J. Phys. Chem. B.* (2012), **116**, 12574–12580 <https://doi.org/10.1021/jp306220q>
4. H. Matsuura, T. Miyazawa, Infrared Spectra and Molecular Vibrations of Ethylene Glycol and Deuterated Derivatives, *Bull. Chem. Soc. Japan.* (1967), **40**, 85–94 <https://doi.org/10.1246/bcsj.40.85>
5. H. Matsuura, M. Hiraishi, T. Miyazawa, Raman spectra and energy difference between rotational isomers of ethylene glycol, *Spectrochim. Acta A Mol. Spectrosc.* (1972), **28**(12), 2299–2304 [https://doi.org/10.1016/0584-8539\(72\)80209-5](https://doi.org/10.1016/0584-8539(72)80209-5)
6. W. Sawodny, K. Niedenzu, J. W. Dawson, The vibrational spectrum of ethylene glycol, *Spectrochim. Acta A Mol. Spectrosc.* (1967), **23**, 799–806 [https://doi.org/10.1016/0584-8539\(67\)80007-2](https://doi.org/10.1016/0584-8539(67)80007-2)
7. R. S. Luo, J. Jonas, Raman scattering study of liquid ethylene glycol confined to nanoporous silica glasses, *J. Raman Spectrosc.* (2001), **32**, 975–978 <https://doi.org/10.1002/jrs.786>
8. A. Miyake, CH<sub>2</sub> Rocking Frequencies of Ethylene Glycol and Its Derivatives in Relation to the Configuration of Polyethylene Glycol, *J. Am. Chem. Soc.* (1960), **82**, 3040–3043 <https://doi.org/10.1021/ja01497a017>
9. N. A. Chumaevskii, M. N. Rodnikova, J. Barthel, Some peculiarities of compounds with spatial H-bond network: H<sub>2</sub>O, H<sub>2</sub>O<sub>2</sub>, HOCH<sub>2</sub>CH<sub>2</sub>OH, *J. Mol. Liq.* (2004), **115**, 63–67 <https://doi.org/10.1016/j.molliq.2004.04.001>
10. E. L. Hommel, J. K. Merle, G. Ma, C. M. Hadad, H. C. Allen, Spectroscopic and Computational Studies of Aqueous Ethylene Glycol Solution Surfaces, *J. Phys. Chem. B.* (2005), **109**(2), 811–818 <https://doi.org/10.1021/jp046715w>
11. O. B. Zubkova, A. N. Shabadash, A study of the IR spectra of monomeric, dimeric, and trimeric ethylene glycol, *J. Appl. Spectrosc.* (1971), **14**, 639–643 <https://doi.org/10.1007/BF00605805>
12. C. G. Gray, K. E. Gubbins, C. G. Joslin, *Theory of Molecular Fluids: Volume 2: Applications* (Oxford, 2011; online edn, Oxford Academic, 19 Jan. 2012) <https://doi.org/10.1093/acprof:oso/9780198556213.001.0001>, accessed 6 Mar. 2025.
